# Supplementary material for: Long-term colonization exceeding six years from early infancy of Bifidobacterium longum subsp. longum in human gut
Source: BMC Microbiol. 2018 Dec 12;18:209. doi: 10.1186/s12866-018-1358-6 (PMC6292050; doi:10.1186/s12866-018-1358-6)
Supplement: Supplementary file 1 — Table S1. Detailed information of the subjects participating in the follow-up study. Table S2. Count of B. longum subsp. longum isolates obtained from the samples collected from the 12 subjects and their mothers. Table S3. Detailed information of the representative strains and the type strains of B. longum subsp. infantis and B. longum subsp. longum. Table S4. Allelic profiles for the representative strains and the type strains of B. longum subsp. infantis and B. longum subsp. longum Table S5. Raw data of qPCR analysis (XLSX 128 kb) [file 12866_2018_1358_MOESM1_ESM.xlsx]

## Sheet: Additional Table 1
Additional Table 1. Detailed information of the subjects participating in the follow-up study.
Subject ID	Gendera	Delivery modeb	1st mothers prenatal fecal samplec (days)	2nd mothers prenatal fecal samplec (days)	After weaningc,d (days)	Age at follow-up (years)	Isolation of B. longum subsp. longum from subject's feces both in early infancy and childhood
4	M	C	-42	-34	133	6.91667	●
12	F	N	-59	-47	> 180	6.66667	●
13	F	N	-31	-24	120	6.66667	●
16	F	N	-38	-31	> 180	6.75	●
18	M	N	-21	-9	136	6.5	●
20	M	N	-47	-40	130	6.41667	−
26	F	N	-36	-29	106	6.66667	−
28	M	N	-43	-35	151	4.33333	−
30	M	C	-25	-18	130	6.66667	●
37	F	N	-32	-25	> 180	6.58333	−
38	M	N	-49	-42	99	6.33333	●
44	M	N	-19	-12	110	6.58333	●
48	M	C	-49	-37	124	6.33333	●
49	F	C	-35	-28	157	6.41667	−
52	F	N	-15	-4	> 180	6.33333	−
53	M	N	-39	-31	> 180	6.41667	−
57	F	N	-38	-31	141	6.41667	−
61	F	N	-26	-17	167	6.58333	−
62	M	N	-21	-11	126	6.33333	−
63	M	N	-30	-24	> 180	6.58333	−
68	M	N	-41	-33	150	6.58333	−
71	F	C	-38	-31	160	6.33333	−
84	M	N	-50	-44	159	6.16667	−
86	F	N	-33	-26	158	6.58333	−
94	F	N	-36	-28	165	6.33333	−
95	F	N	-49	-42	175	6.41667	−
96	F	N	-31	-25	> 180	6.41667	−
100	M	N	-49	-42	138	6.33333	−
106	M	C	-52	-45	130	6.16667	−
107	M	N	-48	-41	> 180	6.16667	−
108A (Twin)	F	C	-57	-50	> 180	6.08333	−
108B (Twin)	F	C	-57	-50	> 180	6.08333	−
109	F	N	-52	-45	148	6.25	−
117	M	N	-41	-34	129	6.16667	−
120	M	N	-46	-38	> 180	7.41667	−
122	F	N	-35	-28	96	6.08333	−
123	M	C	-56	-50	131	5.83333	−
126	F	N	-37	-31	134	6	−
129	F	N	-57	-50	128	5.91667	●
130	M	N	-55	-47	124	6.08333	●
131	M	C	-45	-38	155	6.08333	−
133	F	C	-51	-43	147	5.91667	−
134	M	N	-54	-44	162	5.83333	●
136	F	N	-34	-25	148	5.83333	−
137	M	N	-46	-38	147	5.91667	−
138	M	N	-36	-30	> 180	8.66667	−
139	F	N	-27	-19	172	6.08333	−
140	M	N	-48	-40	133	5.83333	−
141	F	N	-50	-43	161	5.83333	−
a M, male; F, female.
b N, natural delivery; C, cesarean section.
c Sample collection date calculated from delivery date.
d One week after the introduction of solids.

## Sheet: Additional Table 2
Additional Table 2. Count of B. longum subsp. longum isolates obtained from the samples collected from the 12 subjects and their mothers.
Subject ID	Count of isolatesa
	Mother's perinatal samples						Subject's samples
	Prenatal feces			Postnatal breast milk			Feces in early infancy								Feces in childhood
	1st Sample	2nd Sample		7 days	30 days		Meconium	3 days	7 days	30 days	90 days	After Weaningb	180 days		≈ 6 years
4	3	4		−	−		−	−	−	−	−	3	−		4
12	11	7		−	−		−	3	8	4	−	ns	−		3
13	9	11		−	−		−	−	−	−	−	3	4		9
16	12	9		−	−		4	26	22	20	24	ns	5		7
18	9	8		1	−		−	6	6	6	5	−	−		3
30	4	5		−	−		−	ns	−	−	3	2	−		1
38	11	12		−	−		−	11	12	12	−	−	−		2
44	3	−		−	1		−	−	2	−	−	4	−		1
48	−	7		−	1		−	ns	−	6	−	−	−		2
129	−	−		12	8		3	3	3	12	−	−	−		3
130	5	7		−	−		−	3	2	−	−	−	−		7
134	4	−		−	9		−	4	6	6	−	−	−		4
a ns, no sample was collected; −, no isolate was obtained
b One week after the introduction of solids.

## Sheet: Additional Table 3
Additional Table 3. Detailed information of the representative strains and the type strains of B. longum subsp. infantis and B. longum subsp. longum.
Strain ID	Subject ID	Isolated sample type	Detection time pointa	ST	Allelic numbers							Reference fo sequences
					clpC	dnaG	dnaJ	fusA	gyrB	purF	rpoB
31	4	Mother feces (prenatal)	1st sample	4-A	1	20	1	3	1	4	3	This study
35	4	Mother feces (prenatal)	1st sample	4-B	1	21	1	1	12	1	14	This study
1800	4	Subject feces (early infancy)	After weaning	4-C	1	7	1	6	1	6	11	This study
4-2	4	Subject feces (childhood)	≈ 6 years	4-D	1	3	1	1	1	4	3	This study
4-4	4	Subject feces (childhood)	≈ 6 years	4-E	1	1	1	3	7	2	3	This study
4-6	4	Subject feces (childhood)	≈ 6 years	4-F	1	1	1	3	1	2	3	This study
237	12	Mother feces (prenatal)	1st sample	12-A	1	5	1	1	1	2	14	This study
818	12	Subject feces (early infancy)	3 days	12-A	1	5	1	1	1	2	14	This study
238	12	Mother feces (prenatal)	1st sample	12-B	6	12	1	10	10	1	3	This study
856	12	Subject feces (early infancy)	7 days	12-B	6	12	1	10	10	1	3	This study
239	12	Mother feces (prenatal)	1st sample	12-C	6	12	1	1	10	1	15	This study
241	12	Mother feces (prenatal)	1st sample	12-D	1	12	1	10	3	1	3	This study
244	12	Mother feces (prenatal)	1st sample	12-E	1	5	1	10	1	1	15	This study
246	12	Mother feces (prenatal)	1st sample	12-F	6	5	1	1	1	11	15	This study
248	12	Mother feces (prenatal)	1st sample	12-G	6	12	1	1	1	2	15	This study
334	12	Mother feces (prenatal)	2nd sample	12-H	6	12	1	1	10	2	3	This study
336	12	Mother feces (prenatal)	2nd sample	12-I	1	4	4	3	1	2	5	This study
339	12	Mother feces (prenatal)	2nd sample	12-J	6	12	1	3	10	1	15	This study
12-4	12	Subject feces (childhood)	≈ 6 years	12-K	1	16	6	11	3	2	2	This study
12-5	12	Subject feces (childhood)	≈ 6 years	12-L	1	17	6	12	3	4	8	This study
1784	13	Subject feces (early infancy)	After weaning	13-A	1	1	1	3	1	5	10	This study
13-T1	13	Subject feces (childhood)	≈ 6 years	13-A	1	1	1	3	1	5	10	This study
139	13	Mother feces (prenatal)	1st sample	13-B	3	3	1	1	5	2	7	This study
141	13	Mother feces (prenatal)	1st sample	13-C	1	3	3	1	6	2	7	This study
144	13	Mother feces (prenatal)	1st sample	13-D	5	6	1	3	1	2	8	This study
220	13	Mother feces (prenatal)	2nd sample	13-E	1	9	4	8	6	2	10	This study
1847	13	Subject feces (early infancy)	180 days	13-F	5	1	1	3	1	5	10	This study
1848	13	Subject feces (early infancy)	180 days	13-G	5	1	1	3	1	5	13	This study
13-1	13	Subject feces (childhood)	≈ 6 years	13-H	1	3	2	1	1	2	16	This study
13-T2	13	Subject feces (childhood)	≈ 6 years	13-I	1	1	4	3	1	5	10	This study
281	16	Mother feces (prenatal)	1st sample	16-A	1	4	1	3	3	1	5	[1]
401	16	Subject feces (early infancy)	Meconium	16-A	1	4	1	3	3	1	5	[1]
286	16	Mother feces (prenatal)	1st sample	16-B	1	14	1	3	3	4	5	[1]
435	16	Subject feces (early infancy)	3 days	16-B	1	14	1	3	3	4	5	[1]
297	16	Mother feces (prenatal)	1st sample	16-C	1	15	1	3	4	1	5	[1]
441	16	Subject feces (early infancy)	3 days	16-C	1	15	1	3	4	1	5	[1]
326	16	Mother feces (prenatal)	2nd sample	16-D	1	15	1	4	4	3	5	[1]
520	16	Subject feces (early infancy)	7 days	16-D	1	15	1	4	4	3	5	This study
298	16	Mother feces (prenatal)	1st sample	16-E	8	4	1	3	4	1	5	This study
296	16	Mother feces (prenatal)	1st sample	16-F	1	4	1	3	4	1	4	This study
485	16	Subject feces (early infancy)	7 days	16-G	1	15	1	4	4	4	4	This study
521	16	Subject feces (early infancy)	7 days	16-H	1	15	1	4	4	4	5	This study
527	16	Subject feces (early infancy)	7 days	16-I	1	15	1	4	3	4	4	This study
724	16	Subject feces (early infancy)	30 days	16-J	8	15	1	3	3	4	5	This study
1305	16	Subject feces (early infancy)	90 days	16-K	1	4	1	3	3	1	4	This study
1314	16	Subject feces (early infancy)	90 days	16-L	1	4	1	4	4	3	5	This study
16-1	16	Subject feces (childhood)	≈ 6 years	16-M	1	14	1	3	3	1	5	This study
16-T1	16	Subject feces (childhood)	≈ 6 years	16-N	1	15	1	4	4	1	5	This study
865	18	Mother feces (prenatal)	1st sample	18-A	1	2	2	2	2	2	2	This study
1120	18	Subject feces (early infancy)	3 days	18-A	1	2	2	2	2	2	2	This study
1227	18	Breast milk	7 days	18-A	1	2	2	2	2	2	2	This study
18-1	18	Subject feces (childhood)	≈ 6 years	18-B	1	5	1	3	3	2	16	This study
1521	30	Subject feces (early infancy)	90 days	30-A	1	1	1	5	7	1	3	[1]
30-1	30	Subject feces (childhood)	≈ 6 years	30-A	1	1	1	5	7	1	3	This study
630	30	Mother feces (prenatal)	1st sample	30-B	1	1	1	1	7	1	13	[1]
631	30	Mother feces (prenatal)	1st sample	30-C	1	3	1	3	7	12	13	[1]
1082	38	Mother feces (prenatal)	1st sample	38-A	1	1	1	1	1	1	1	This study
1699	38	Subject feces (early infancy)	3 days	38-A	1	1	1	1	1	1	1	This study
1835	38	Mother feces (prenatal)	1st sample	38-B	1	3	1	3	8	4	3	This study
1688	38	Subject feces (early infancy)	7 days	38-B	1	3	1	3	8	4	3	This study
1078	38	Mother feces (prenatal)	1st sample	38-C	1	4	8	3	1	2	9	This study
1687	38	Subject feces (early infancy)	7 days	38-D	1	4	1	3	1	2	9	This study
38-1	38	Subject feces (childhood)	≈ 6 years	38-E	1	3	1	1	3	2	19	This study
977	44	Mother feces (prenatal)	1st sample	44-A	2	3	1	1	1	1	3	This study
1268	44	Subject feces (early infancy)	7 days	44-A	2	3	1	1	1	1	3	This study
1426	44	Breast milk	30 days	44-B	4	1	1	3	6	2	3	This study
1854	44	Subject feces (early infancy)	After weaning	44-B	4	1	1	3	6	2	3	This study
44-1	44	Subject feces (childhood)	≈ 6 years	44-B	4	1	1	3	6	2	3	This study
1620	48	Breast milk	30 days	48-A	4	8	1	7	1	4	12	This study
1841	48	Subject feces (early infancy)	30 days	48-A	4	8	1	7	1	4	12	[1]
1362	48	Mother feces (prenatal)	2nd sample	48-B	1	5	1	3	1	4	6	[1]
1844	48	Subject feces (early infancy)	30 days	48-C	4	8	1	7	1	2	12	[1]
48-1	48	Subject feces (childhood)	≈ 6 years	48-D	1	3	1	14	3	4	12	This study
48-2	48	Subject feces (childhood)	≈ 6 years	48-E	1	3	8	3	3	14	12	This study
2285	129	Subject feces (early infancy)	Meconium	129-A	1	10	1	1	1	2	2	This study
2220	129	Breast milk	7 days	129-A	1	10	1	1	1	2	2	This study
129-4	129	Subject feces (childhood)	≈ 6 years	129-B	1	3	1	9	1	2	3	This study
2296	130	Mother feces (prenatal)	1st sample	130-A	1	4	1	9	9	8	13	This study
2317	130	Subject feces (early infancy)	3 days	130-A	1	4	1	9	9	8	13	This study
2297	130	Mother feces (prenatal)	1st sample	130-B	1	11	1	1	9	7	2	This study
2316	130	Subject feces (early infancy)	3 days	130-B	1	11	1	1	9	7	2	This study
2302	130	Mother feces (prenatal)	1st sample	130-C	1	4	1	9	3	9	13	This study
2315	130	Subject feces (early infancy)	3 days	130-C	1	4	1	9	3	9	13	This study
2295	130	Mother feces (prenatal)	1st sample	130-D	1	11	5	1	9	7	2	This study
2308	130	Mother feces (prenatal)	2nd sample	130-E	1	11	5	1	3	7	2	This study
130-1	130	Subject feces (childhood)	≈ 6 years	130-F	1	18	1	13	3	4	17	This study
130-3	130	Subject feces (childhood)	≈ 6 years	130-G	1	18	1	13	3	2	17	This study
130-5	130	Subject feces (childhood)	≈ 6 years	130-H	1	18	1	13	6	4	17	This study
130-6	130	Subject feces (childhood)	≈ 6 years	130-I	1	18	7	13	6	4	17	This study
2476	134	Mother feces (prenatal)	1st sample	134-A	7	3	1	1	11	10	14	[1]
2488	134	Subject feces (early infancy)	3 days	134-A	7	3	1	1	11	10	14	[1]
2452	134	Breast milk	30 days	134-A	7	3	1	1	11	10	14	This study
2493	134	Subject feces (early infancy)	3 days	134-B	1	13	2	3	3	2	1	This study
2459	134	Breast milk	30 days	134-B	1	13	2	3	3	2	1	This study
134-1	134	Subject feces (childhood)	≈ 6 years	134-C	1	19	1	3	1	13	18	This study
134-4	134	Subject feces (childhood)	≈ 6 years	134-D	7	5	1	3	7	2	3	This study
B. longum subsp. infantis (JCM 1222T)	−	−	−	INF	9	22	9	15	13	3	20	[2]
B. longum subsp. longum (JCM 1217T)	−	−	−	LON	5	14	1	3	14	2	3	[2]
a Calculated from the delivery date; "After weaning", one week after the introduction of solids.
References
1. Makino H, Kushiro A, Ishikawa E, Kubota H, Gawad A, Sakai T, et al. Mother-to-infant transmission of intestinal bifidobacterial strains has an impact on the early development of vaginally delivered infant’s microbiota. PLoS One. 2013;8:e78331.
2. Fukuda S, Toh H, Hase K, Oshima K, Nakanishi Y, Yoshimura K, et al. Bifidobacteria can protect from enteropathogenic infection through production of acetate. Nature. 2011;469:543-7.

## Sheet: Additional Table 4
Additional Table 4. Allelic profiles for the representative strains and the type strains of B. longum subsp. infantis and B. longum subsp. longum.
Strain ID	ST	Gene names
		clpC	clpC	clpC	clpC	clpC	clpC	clpC	clpC	clpC	clpC	clpC	clpC	clpC	clpC	clpC	dnaG	dnaG	dnaG	dnaG	dnaG	dnaG	dnaG	dnaG	dnaG	dnaG	dnaG	dnaG	dnaG	dnaG	dnaG	dnaG	dnaG	dnaG	dnaG	dnaG	dnaG	dnaG	dnaG	dnaG	dnaG	dnaG	dnaG	dnaG	dnaG	dnaG	dnaG	dnaG	dnaG
		Site numbera
		27	78	93	102	153	156	201	210	225	276	312	315	357	360	431	6	9	15	21	24	30	39	53	54	63	64	69	84	85	86	87	90	92	93	96	102	105	108	109	110	115	117	122	124	150	156	162	165
31	4-A	T	C	T	C	C	T	C	G	C	T	T	C	A	C	C	C	C	C	G	G	C	G	T	T	T	C	T	C	A	G	T	C	A	C	T	G	G	G	G	T	G	C	T	T	C	C	A	A
35	4-B	T	C	T	C	C	T	C	G	C	T	T	C	A	C	C	C	C	A	G	A	C	G	C	T	T	C	T	T	A	G	T	C	A	C	T	G	G	T	C	C	T	G	C	C	C	T	C	G
1800	4-C	T	C	T	C	C	T	C	G	C	T	T	C	A	C	C	C	C	C	G	G	C	G	C	T	T	C	T	C	A	G	T	C	A	C	T	G	G	G	G	T	G	C	T	T	C	C	A	A
4-2	4-D	T	C	T	C	C	T	C	G	C	T	T	C	A	C	C	C	T	C	A	G	G	G	C	C	G	T	A	C	G	G	T	T	A	T	C	A	A	T	C	C	T	G	T	C	T	G	C	G
4-4	4-E	T	C	T	C	C	T	C	G	C	T	T	C	A	C	C	C	C	C	G	G	C	G	C	T	T	C	T	C	A	G	T	C	A	C	T	G	G	G	G	T	G	C	T	T	C	C	A	A
4-6	4-F	T	C	T	C	C	T	C	G	C	T	T	C	A	C	C	C	C	C	G	G	C	G	C	T	T	C	T	C	A	G	T	C	A	C	T	G	G	G	G	T	G	C	T	T	C	C	A	A
237	12-A	T	C	T	C	C	T	C	G	C	T	T	C	A	C	C	C	C	C	G	G	C	G	C	T	T	C	T	C	A	G	T	C	A	C	T	G	G	G	G	T	G	C	T	T	C	C	A	A
818	12-A	T	C	T	C	C	T	C	G	C	T	T	C	A	C	C	C	C	C	G	G	C	G	C	T	T	C	T	C	A	G	T	C	A	C	T	G	G	G	G	T	G	C	T	T	C	C	A	A
238	12-B	C	C	C	T	C	T	C	C	C	C	T	C	A	C	T	C	T	C	G	G	G	G	C	C	G	T	A	C	A	C	C	T	G	C	T	G	G	G	G	T	G	C	T	T	C	C	A	A
856	12-B	C	C	C	T	C	T	C	C	C	C	T	C	A	C	T	C	T	C	G	G	G	G	C	C	G	T	A	C	A	C	C	T	G	C	T	G	G	G	G	T	G	C	T	T	C	C	A	A
239	12-C	C	C	C	T	C	T	C	C	C	C	T	C	A	C	T	C	T	C	G	G	G	G	C	C	G	T	A	C	A	C	C	T	G	C	T	G	G	G	G	T	G	C	T	T	C	C	A	A
241	12-D	T	C	T	C	C	T	C	G	C	T	T	C	A	C	C	C	T	C	G	G	G	G	C	C	G	T	A	C	A	C	C	T	G	C	T	G	G	G	G	T	G	C	T	T	C	C	A	A
244	12-E	T	C	T	C	C	T	C	G	C	T	T	C	A	C	C	C	C	C	G	G	C	G	C	T	T	C	T	C	A	G	T	C	A	C	T	G	G	G	G	T	G	C	T	T	C	C	A	A
246	12-F	C	C	C	T	C	T	C	C	C	C	T	C	A	C	T	C	C	C	G	G	C	G	C	T	T	C	T	C	A	G	T	C	A	C	T	G	G	G	G	T	G	C	T	T	C	C	A	A
248	12-G	C	C	C	T	C	T	C	C	C	C	T	C	A	C	T	C	T	C	G	G	G	G	C	C	G	T	A	C	A	C	C	T	G	C	T	G	G	G	G	T	G	C	T	T	C	C	A	A
334	12-H	C	C	C	T	C	T	C	C	C	C	T	C	A	C	T	C	T	C	G	G	G	G	C	C	G	T	A	C	A	C	C	T	G	C	T	G	G	G	G	T	G	C	T	T	C	C	A	A
336	12-I	T	C	T	C	C	T	C	G	C	T	T	C	A	C	C	C	T	C	A	G	G	G	C	C	G	T	A	C	A	C	C	T	G	C	T	G	G	G	G	T	G	C	T	T	C	C	A	A
339	12-J	C	C	C	T	C	T	C	C	C	C	T	C	A	C	T	C	T	C	G	G	G	G	C	C	G	T	A	C	A	C	C	T	G	C	T	G	G	G	G	T	G	C	T	T	C	C	A	A
12-4	12-K	T	C	T	C	C	T	C	G	C	T	T	C	A	C	C	C	C	C	A	G	G	G	C	T	T	C	T	C	A	G	T	C	A	C	T	G	G	G	G	T	G	C	T	T	C	C	A	A
12-5	12-L	T	C	T	C	C	T	C	G	C	T	T	C	A	C	C	C	T	C	A	G	G	G	C	T	T	C	T	C	A	G	T	C	A	C	T	G	G	G	G	T	G	C	T	T	C	C	A	A
1784	13-A	T	C	T	C	C	T	C	G	C	T	T	C	A	C	C	C	C	C	G	G	C	G	C	T	T	C	T	C	A	G	T	C	A	C	T	G	G	G	G	T	G	C	T	T	C	C	A	A
13-T1	13-A	T	C	T	C	C	T	C	G	C	T	T	C	A	C	C	C	C	C	G	G	C	G	C	T	T	C	T	C	A	G	T	C	A	C	T	G	G	G	G	T	G	C	T	T	C	C	A	A
139	13-B	T	C	T	C	C	T	T	G	T	T	T	C	A	C	C	C	T	C	A	G	G	G	C	C	G	T	A	C	G	G	T	T	A	T	C	A	A	T	C	C	T	G	T	C	T	G	C	G
141	13-C	T	C	T	C	C	T	C	G	C	T	T	C	A	C	C	C	T	C	A	G	G	G	C	C	G	T	A	C	G	G	T	T	A	T	C	A	A	T	C	C	T	G	T	C	T	G	C	G
144	13-D	T	C	T	C	C	T	C	G	C	C	T	T	A	C	C	C	C	C	G	G	C	G	C	T	T	C	T	C	A	G	T	C	A	C	T	G	G	G	G	T	G	C	T	T	C	C	A	A
220	13-E	T	C	T	C	C	T	C	G	C	T	T	C	A	C	C	C	T	C	G	G	G	G	C	C	G	T	A	C	G	G	T	T	A	T	C	A	A	T	C	C	T	G	T	C	T	G	C	G
1847	13-F	T	C	T	C	C	T	C	G	C	C	T	T	A	C	C	C	C	C	G	G	C	G	C	T	T	C	T	C	A	G	T	C	A	C	T	G	G	G	G	T	G	C	T	T	C	C	A	A
1848	13-G	T	C	T	C	C	T	C	G	C	C	T	T	A	C	C	C	C	C	G	G	C	G	C	T	T	C	T	C	A	G	T	C	A	C	T	G	G	G	G	T	G	C	T	T	C	C	A	A
13-1	13-H	T	C	T	C	C	T	C	G	C	T	T	C	A	C	C	C	T	C	A	G	G	G	C	C	G	T	A	C	G	G	T	T	A	T	C	A	A	T	C	C	T	G	T	C	T	G	C	G
13-T2	13-I	T	C	T	C	C	T	C	G	C	T	T	C	A	C	C	C	C	C	G	G	C	G	C	T	T	C	T	C	A	G	T	C	A	C	T	G	G	G	G	T	G	C	T	T	C	C	A	A
281	16-A	T	C	T	C	C	T	C	G	C	T	T	C	A	C	C	C	T	C	A	G	G	G	C	C	G	T	A	C	A	C	C	T	G	C	T	G	G	G	G	T	G	C	T	T	C	C	A	A
401	16-A	T	C	T	C	C	T	C	G	C	T	T	C	A	C	C	C	T	C	A	G	G	G	C	C	G	T	A	C	A	C	C	T	G	C	T	G	G	G	G	T	G	C	T	T	C	C	A	A
286	16-B	T	C	T	C	C	T	C	G	C	T	T	C	A	C	C	T	C	C	G	G	C	G	C	T	T	C	T	C	A	G	T	C	A	C	T	G	G	G	G	T	G	C	T	T	C	C	A	A
435	16-B	T	C	T	C	C	T	C	G	C	T	T	C	A	C	C	T	C	C	G	G	C	G	C	T	T	C	T	C	A	G	T	C	A	C	T	G	G	G	G	T	G	C	T	T	C	C	A	A
297	16-C	T	C	T	C	C	T	C	G	C	T	T	C	A	C	C	C	C	C	G	G	G	G	C	C	G	T	A	C	A	C	C	T	G	C	T	G	G	G	G	T	G	C	T	T	C	C	A	A
441	16-C	T	C	T	C	C	T	C	G	C	T	T	C	A	C	C	C	C	C	G	G	G	G	C	C	G	T	A	C	A	C	C	T	G	C	T	G	G	G	G	T	G	C	T	T	C	C	A	A
326	16-D	T	C	T	C	C	T	C	G	C	T	T	C	A	C	C	C	C	C	G	G	G	G	C	C	G	T	A	C	A	C	C	T	G	C	T	G	G	G	G	T	G	C	T	T	C	C	A	A
520	16-D	T	C	T	C	C	T	C	G	C	T	T	C	A	C	C	C	C	C	G	G	G	G	C	C	G	T	A	C	A	C	C	T	G	C	T	G	G	G	G	T	G	C	T	T	C	C	A	A
298	16-E	T	C	T	C	C	T	C	G	C	T	C	C	A	C	C	C	T	C	A	G	G	G	C	C	G	T	A	C	A	C	C	T	G	C	T	G	G	G	G	T	G	C	T	T	C	C	A	A
296	16-F	T	C	T	C	C	T	C	G	C	T	T	C	A	C	C	C	T	C	A	G	G	G	C	C	G	T	A	C	A	C	C	T	G	C	T	G	G	G	G	T	G	C	T	T	C	C	A	A
485	16-G	T	C	T	C	C	T	C	G	C	T	T	C	A	C	C	C	C	C	G	G	G	G	C	C	G	T	A	C	A	C	C	T	G	C	T	G	G	G	G	T	G	C	T	T	C	C	A	A
521	16-H	T	C	T	C	C	T	C	G	C	T	T	C	A	C	C	C	C	C	G	G	G	G	C	C	G	T	A	C	A	C	C	T	G	C	T	G	G	G	G	T	G	C	T	T	C	C	A	A
527	16-I	T	C	T	C	C	T	C	G	C	T	T	C	A	C	C	C	C	C	G	G	G	G	C	C	G	T	A	C	A	C	C	T	G	C	T	G	G	G	G	T	G	C	T	T	C	C	A	A
724	16-J	T	C	T	C	C	T	C	G	C	T	C	C	A	C	C	C	C	C	G	G	G	G	C	C	G	T	A	C	A	C	C	T	G	C	T	G	G	G	G	T	G	C	T	T	C	C	A	A
1305	16-K	T	C	T	C	C	T	C	G	C	T	T	C	A	C	C	C	T	C	A	G	G	G	C	C	G	T	A	C	A	C	C	T	G	C	T	G	G	G	G	T	G	C	T	T	C	C	A	A
1314	16-L	T	C	T	C	C	T	C	G	C	T	T	C	A	C	C	C	T	C	A	G	G	G	C	C	G	T	A	C	A	C	C	T	G	C	T	G	G	G	G	T	G	C	T	T	C	C	A	A
16-1	16-M	T	C	T	C	C	T	C	G	C	T	T	C	A	C	C	T	C	C	G	G	C	G	C	T	T	C	T	C	A	G	T	C	A	C	T	G	G	G	G	T	G	C	T	T	C	C	A	A
16-T1	16-N	T	C	T	C	C	T	C	G	C	T	T	C	A	C	C	C	C	C	G	G	G	G	C	C	G	T	A	C	A	C	C	T	G	C	T	G	G	G	G	T	G	C	T	T	C	C	A	A
865	18-A	T	C	T	C	C	T	C	G	C	T	T	C	A	C	C	C	T	C	A	G	G	G	C	T	T	C	T	C	A	G	T	C	A	C	T	G	G	G	G	T	G	C	T	T	C	C	A	A
1120	18-A	T	C	T	C	C	T	C	G	C	T	T	C	A	C	C	C	T	C	A	G	G	G	C	T	T	C	T	C	A	G	T	C	A	C	T	G	G	G	G	T	G	C	T	T	C	C	A	A
1227	18-A	T	C	T	C	C	T	C	G	C	T	T	C	A	C	C	C	T	C	A	G	G	G	C	T	T	C	T	C	A	G	T	C	A	C	T	G	G	G	G	T	G	C	T	T	C	C	A	A
18-1	18-B	T	C	T	C	C	T	C	G	C	T	T	C	A	C	C	C	C	C	G	G	C	G	C	T	T	C	T	C	A	G	T	C	A	C	T	G	G	G	G	T	G	C	T	T	C	C	A	A
1521	30-A	T	C	T	C	C	T	C	G	C	T	T	C	A	C	C	C	C	C	G	G	C	G	C	T	T	C	T	C	A	G	T	C	A	C	T	G	G	G	G	T	G	C	T	T	C	C	A	A
30-1	30-A	T	C	T	C	C	T	C	G	C	T	T	C	A	C	C	C	C	C	G	G	C	G	C	T	T	C	T	C	A	G	T	C	A	C	T	G	G	G	G	T	G	C	T	T	C	C	A	A
630	30-B	T	C	T	C	C	T	C	G	C	T	T	C	A	C	C	C	C	C	G	G	C	G	C	T	T	C	T	C	A	G	T	C	A	C	T	G	G	G	G	T	G	C	T	T	C	C	A	A
631	30-C	T	C	T	C	C	T	C	G	C	T	T	C	A	C	C	C	T	C	A	G	G	G	C	C	G	T	A	C	G	G	T	T	A	T	C	A	A	T	C	C	T	G	T	C	T	G	C	G
1082	38-A	T	C	T	C	C	T	C	G	C	T	T	C	A	C	C	C	C	C	G	G	C	G	C	T	T	C	T	C	A	G	T	C	A	C	T	G	G	G	G	T	G	C	T	T	C	C	A	A
1699	38-A	T	C	T	C	C	T	C	G	C	T	T	C	A	C	C	C	C	C	G	G	C	G	C	T	T	C	T	C	A	G	T	C	A	C	T	G	G	G	G	T	G	C	T	T	C	C	A	A
1835	38-B	T	C	T	C	C	T	C	G	C	T	T	C	A	C	C	C	T	C	A	G	G	G	C	C	G	T	A	C	G	G	T	T	A	T	C	A	A	T	C	C	T	G	T	C	T	G	C	G
1688	38-B	T	C	T	C	C	T	C	G	C	T	T	C	A	C	C	C	T	C	A	G	G	G	C	C	G	T	A	C	G	G	T	T	A	T	C	A	A	T	C	C	T	G	T	C	T	G	C	G
1078	38-C	T	C	T	C	C	T	C	G	C	T	T	C	A	C	C	C	T	C	A	G	G	G	C	C	G	T	A	C	A	C	C	T	G	C	T	G	G	G	G	T	G	C	T	T	C	C	A	A
1687	38-D	T	C	T	C	C	T	C	G	C	T	T	C	A	C	C	C	T	C	A	G	G	G	C	C	G	T	A	C	A	C	C	T	G	C	T	G	G	G	G	T	G	C	T	T	C	C	A	A
38-1	38-E	T	C	T	C	C	T	C	G	C	T	T	C	A	C	C	C	T	C	A	G	G	G	C	C	G	T	A	C	G	G	T	T	A	T	C	A	A	T	C	C	T	G	T	C	T	G	C	G
977	44-A	T	C	T	C	C	T	C	G	C	C	T	C	A	C	C	C	T	C	A	G	G	G	C	C	G	T	A	C	G	G	T	T	A	T	C	A	A	T	C	C	T	G	T	C	T	G	C	G
1268	44-A	T	C	T	C	C	T	C	G	C	C	T	C	A	C	C	C	T	C	A	G	G	G	C	C	G	T	A	C	G	G	T	T	A	T	C	A	A	T	C	C	T	G	T	C	T	G	C	G
1426	44-B	T	C	T	C	C	T	C	G	C	T	T	C	G	T	C	C	C	C	G	G	C	G	C	T	T	C	T	C	A	G	T	C	A	C	T	G	G	G	G	T	G	C	T	T	C	C	A	A
1854	44-B	T	C	T	C	C	T	C	G	C	T	T	C	G	T	C	C	C	C	G	G	C	G	C	T	T	C	T	C	A	G	T	C	A	C	T	G	G	G	G	T	G	C	T	T	C	C	A	A
44-1	44-B	T	C	T	C	C	T	C	G	C	T	T	C	G	T	C	C	C	C	G	G	C	G	C	T	T	C	T	C	A	G	T	C	A	C	T	G	G	G	G	T	G	C	T	T	C	C	A	A
1620	48-A	T	C	T	C	C	T	C	G	C	T	T	C	G	T	C	C	T	C	A	G	G	G	C	C	G	T	A	C	G	G	T	T	A	T	C	A	A	T	C	C	T	G	T	C	T	G	C	G
1841	48-A	T	C	T	C	C	T	C	G	C	T	T	C	G	T	C	C	T	C	A	G	G	G	C	C	G	T	A	C	G	G	T	T	A	T	C	A	A	T	C	C	T	G	T	C	T	G	C	G
1362	48-B	T	C	T	C	C	T	C	G	C	T	T	C	A	C	C	C	C	C	G	G	C	G	C	T	T	C	T	C	A	G	T	C	A	C	T	G	G	G	G	T	G	C	T	T	C	C	A	A
1844	48-C	T	C	T	C	C	T	C	G	C	T	T	C	G	T	C	C	T	C	A	G	G	G	C	C	G	T	A	C	G	G	T	T	A	T	C	A	A	T	C	C	T	G	T	C	T	G	C	G
48-1	48-D	T	C	T	C	C	T	C	G	C	T	T	C	A	C	C	C	T	C	A	G	G	G	C	C	G	T	A	C	G	G	T	T	A	T	C	A	A	T	C	C	T	G	T	C	T	G	C	G
48-2	48-E	T	C	T	C	C	T	C	G	C	T	T	C	A	C	C	C	T	C	A	G	G	G	C	C	G	T	A	C	G	G	T	T	A	T	C	A	A	T	C	C	T	G	T	C	T	G	C	G
2285	129-A	T	C	T	C	C	T	C	G	C	T	T	C	A	C	C	C	C	C	G	G	C	G	C	T	G	C	T	C	A	G	T	C	A	C	T	G	G	G	G	T	G	C	T	T	C	C	A	A
2220	129-A	T	C	T	C	C	T	C	G	C	T	T	C	A	C	C	C	C	C	G	G	C	G	C	T	G	C	T	C	A	G	T	C	A	C	T	G	G	G	G	T	G	C	T	T	C	C	A	A
129-4	129-B	T	C	T	C	C	T	C	G	C	T	T	C	A	C	C	C	T	C	A	G	G	G	C	C	G	T	A	C	G	G	T	T	A	T	C	A	A	T	C	C	T	G	T	C	T	G	C	G
2296	130-A	T	C	T	C	C	T	C	G	C	T	T	C	A	C	C	C	T	C	A	G	G	G	C	C	G	T	A	C	A	C	C	T	G	C	T	G	G	G	G	T	G	C	T	T	C	C	A	A
2317	130-A	T	C	T	C	C	T	C	G	C	T	T	C	A	C	C	C	T	C	A	G	G	G	C	C	G	T	A	C	A	C	C	T	G	C	T	G	G	G	G	T	G	C	T	T	C	C	A	A
2297	130-B	T	C	T	C	C	T	C	G	C	T	T	C	A	C	C	C	C	C	G	G	C	G	C	T	T	C	T	C	A	G	T	C	A	C	T	G	G	G	G	T	G	C	T	T	C	C	A	A
2316	130-B	T	C	T	C	C	T	C	G	C	T	T	C	A	C	C	C	C	C	G	G	C	G	C	T	T	C	T	C	A	G	T	C	A	C	T	G	G	G	G	T	G	C	T	T	C	C	A	A
2302	130-C	T	C	T	C	C	T	C	G	C	T	T	C	A	C	C	C	T	C	A	G	G	G	C	C	G	T	A	C	A	C	C	T	G	C	T	G	G	G	G	T	G	C	T	T	C	C	A	A
2315	130-C	T	C	T	C	C	T	C	G	C	T	T	C	A	C	C	C	T	C	A	G	G	G	C	C	G	T	A	C	A	C	C	T	G	C	T	G	G	G	G	T	G	C	T	T	C	C	A	A
2295	130-D	T	C	T	C	C	T	C	G	C	T	T	C	A	C	C	C	C	C	G	G	C	G	C	T	T	C	T	C	A	G	T	C	A	C	T	G	G	G	G	T	G	C	T	T	C	C	A	A
2308	130-E	T	C	T	C	C	T	C	G	C	T	T	C	A	C	C	C	C	C	G	G	C	G	C	T	T	C	T	C	A	G	T	C	A	C	T	G	G	G	G	T	G	C	T	T	C	C	A	A
130-1	130-F	T	C	T	C	C	T	C	G	C	T	T	C	A	C	C	C	C	C	G	G	G	G	C	C	G	T	A	C	G	G	T	T	A	T	C	A	A	T	C	C	T	G	T	C	T	G	C	G
130-3	130-G	T	C	T	C	C	T	C	G	C	T	T	C	A	C	C	C	C	C	G	G	G	G	C	C	G	T	A	C	G	G	T	T	A	T	C	A	A	T	C	C	T	G	T	C	T	G	C	G
130-5	130-H	T	C	T	C	C	T	C	G	C	T	T	C	A	C	C	C	C	C	G	G	G	G	C	C	G	T	A	C	G	G	T	T	A	T	C	A	A	T	C	C	T	G	T	C	T	G	C	G
130-6	130-I	T	C	T	C	C	T	C	G	C	T	T	C	A	C	C	C	C	C	G	G	G	G	C	C	G	T	A	C	G	G	T	T	A	T	C	A	A	T	C	C	T	G	T	C	T	G	C	G
2476	134-A	T	A	T	C	C	T	C	G	C	T	T	C	A	C	C	C	T	C	A	G	G	G	C	C	G	T	A	C	G	G	T	T	A	T	C	A	A	T	C	C	T	G	T	C	T	G	C	G
2488	134-A	T	A	T	C	C	T	C	G	C	T	T	C	A	C	C	C	T	C	A	G	G	G	C	C	G	T	A	C	G	G	T	T	A	T	C	A	A	T	C	C	T	G	T	C	T	G	C	G
2452	134-A	T	A	T	C	C	T	C	G	C	T	T	C	A	C	C	C	T	C	A	G	G	G	C	C	G	T	A	C	G	G	T	T	A	T	C	A	A	T	C	C	T	G	T	C	T	G	C	G
2493	134-B	T	C	T	C	C	T	C	G	C	T	T	C	A	C	C	C	C	C	G	G	C	G	C	T	G	T	A	C	G	G	T	T	A	T	C	A	A	T	C	C	T	G	T	C	T	G	C	G
2459	134-B	T	C	T	C	C	T	C	G	C	T	T	C	A	C	C	C	C	C	G	G	C	G	C	T	G	T	A	C	G	G	T	T	A	T	C	A	A	T	C	C	T	G	T	C	T	G	C	G
134-1	134-C	T	C	T	C	C	T	C	G	C	T	T	C	A	C	C	C	T	C	G	G	C	G	C	C	G	T	A	C	G	G	T	T	A	T	C	A	A	T	C	C	T	G	T	C	T	G	C	G
134-4	134-D	T	A	T	C	C	T	C	G	C	T	T	C	A	C	C	C	C	C	G	G	C	G	C	T	T	C	T	C	A	G	T	C	A	C	T	G	G	G	G	T	G	C	T	T	C	C	A	A
B. longum subsp. infantis (JCM 1222T)	INF	C	C	C	T	T	A	C	G	C	C	T	C	A	C	C	C	C	A	G	G	C	A	C	C	G	T	A	C	G	G	T	T	A	T	C	A	A	T	C	C	T	G	C	C	T	G	C	G
B. longum subsp. longum (JCM 1217T)	LON	T	C	T	C	C	T	C	G	C	C	T	T	A	C	C	T	C	C	G	G	C	G	C	T	T	C	T	C	A	G	T	C	A	C	T	G	G	G	G	T	G	C	T	T	C	C	A	A
a Numbering starts at the beginning of the aligned sequence portion of each gene.
[truncated: 199 more columns]

## Sheet: Additional Table 5
Additional Table 5. Raw data of qPCR analysis
	Bacterial counts (log10 cells / g feces)a
	Subject 4									Subject 12									Subject 13b									Subject 16									Subject 18									Subject 30b
Target	0 day	3 days	7 days	30 days	90 days	After weaningc (133 days)	180 days	≈ 6 years		0 day	3 days	7 days	30 days	90 days	After weaningc (> 180 days)	180 days	≈ 6 years		0 day	3 days	7 days	30 days	90 days	After weaningc (120 days)	180 days	≈ 6 years		0 day	3 days	7 days	30 days	90 days	After weaningc (> 180 days)	180 days	≈ 6 years		0 day	3 days	7 days	30 days	90 days	After weaningc (136 days)	180 days	≈ 6 years		0 day	3 days	7 days	30 days
Genus Bifidobacterium	−	−	6.6483	9.23066	9.26511	8.94233	9.99054	9.13116		−	−	6.6483	9.23066	9.26511	8.94233	9.99054	9.13116		8.95783	10.247	10.6929	10.4936	9.83648	9.71278	10.0693	9.83663		−	9.26415	8.868	9.11734	8.81104	ns	ns	9.50028		−	9.64044	9.21611	9.22437	10.238	10.2005	9.47802	10.0019		6.10844	ns	−	−
B. adolescentis	−	−	−	−	−	−	−	−		−	−	−	−	−	−	−	−		−	−	−	−	6.41856	−	−	10.0376		−	8.37569	−	−	6.20961	ns	ns	7.97914		−	−	−	6.13614	−	−	−	8.15616		−	ns	−	−
B. animalis subsp. lactis	−	−	6.71239	9.4075	9.52623	−	7.63475	−		−	−	6.71239	9.4075	9.52623	−	7.63475	−		−	−	−	7.6426	−	−	−	−		−	−	−	−	−	ns	ns	−		−	−	−	−	−	−	−	−		−	ns	−	−
B. bifidum	−	−	−	−	6.16728	6.10736	−	9.04139		−	−	−	−	6.16728	6.10736	−	9.04139		−	−	−	−	9.78299	10.1217	9.0483	−		−	8.66711	9.20356	9.5677	9.3155	ns	ns	9.56834		−	−	−	−	−	−	9.20173	−		6.22426	ns	−	−
B. breve	−	−	−	−	−	−	8.80965	−		−	−	−	−	−	−	8.80965	−		8.80646	10.5649	10.5322	10.3009	9.38937	9.71714	8.50279	−		−	−	−	−	−	ns	ns	−		−	8.94152	8.51213	8.45023	9.67823	9.49499	7.60018	−		−	ns	−	−
B. catenulatum group	−	−	−	−	−	−	8.87358	8.41908		−	−	−	−	−	−	8.87358	8.41908		−	−	−	−	−	−	−	−		−	−	−	−	−	ns	ns	8.8629		−	−	−	−	−	−	−	9.56651		−	ns	−	−
B. dentium	−	−	6.09266	−	−	−	−	−		−	−	6.09266	−	−	−	−	−		−	−	−	−	−	−	−	−		−	7.16197	−	−	−	ns	ns	−		−	−	−	−	−	−	9.01989	−		−	ns	−	−
B. longum subsp. infantis	−	−	−	−	−	−	8.48456	−		−	−	−	−	−	−	8.48456	−		−	−	−	−	−	−	−	−		−	−	−	−	−	ns	ns	−		−	−	−	−	−	−	−	−		−	ns	−	−
B. longum subsp. longum	−	−	−	−	−	9.60348	8.29588	8.61325		−	−	−	−	−	9.60348	8.29588	8.61325		−	−	−	−	8.0838	8.42208	9.65381	9.17426		−	8.54632	8.33328	8.66951	8.4999	ns	ns	8.35376		−	9.49476	9.01649	8.98047	10.0388	9.92509	9.42458	8.83135		−	ns	−	−
a ns, no sample was collected; −, not detected.
b Subject from whose fecal samples at least one monophyletic strain was detected in early infancy and childhood.
c One week after the introduction of solids.
[truncated: 52 more columns]
